# Supplementary material for: Structure elucidation of 4-carboxy-3-deoxyanthocyanidins formed from thermal degradation of hydroxyphenyl-pyranoanthocyanins
Source: Royal Society of Chemistry journal article supplement (doi:10.1039/d3nj02233a), 2023-01-01
Supplement: d3nj02233a1.pdf [file d3nj02233a1.pdf]

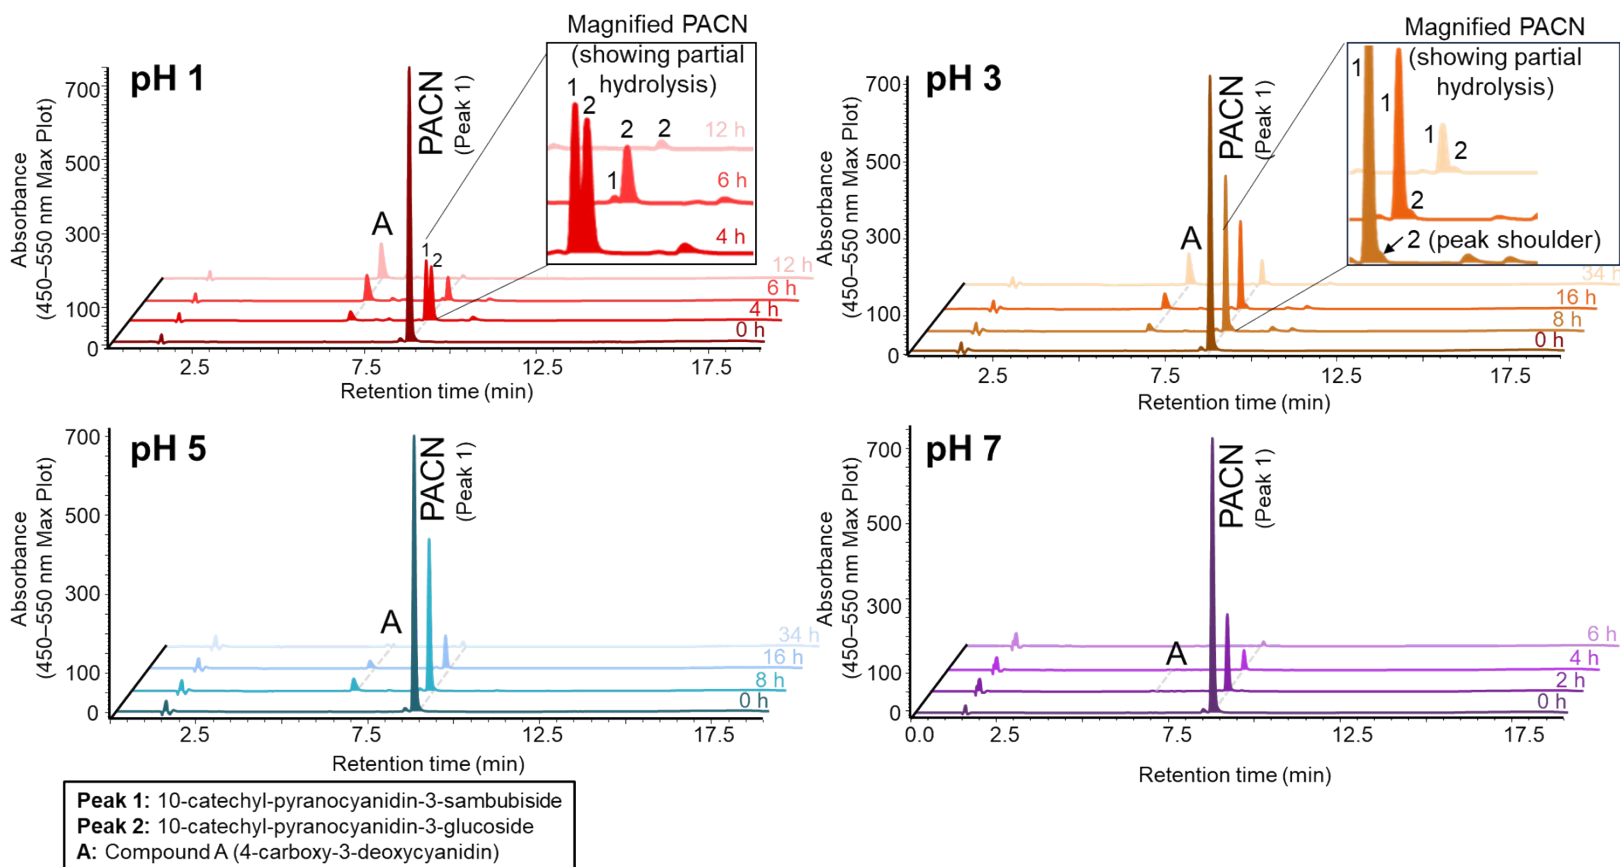

**Figure S1.** HPLC-PDA chromatograms of 10-catechyl-pyranoanthocyanidin-3-sambubiside (peak 1) at four pH values heated at 90 °C. Compound A (peak A) formed at all pH values, however the peak was very small at pH 7.

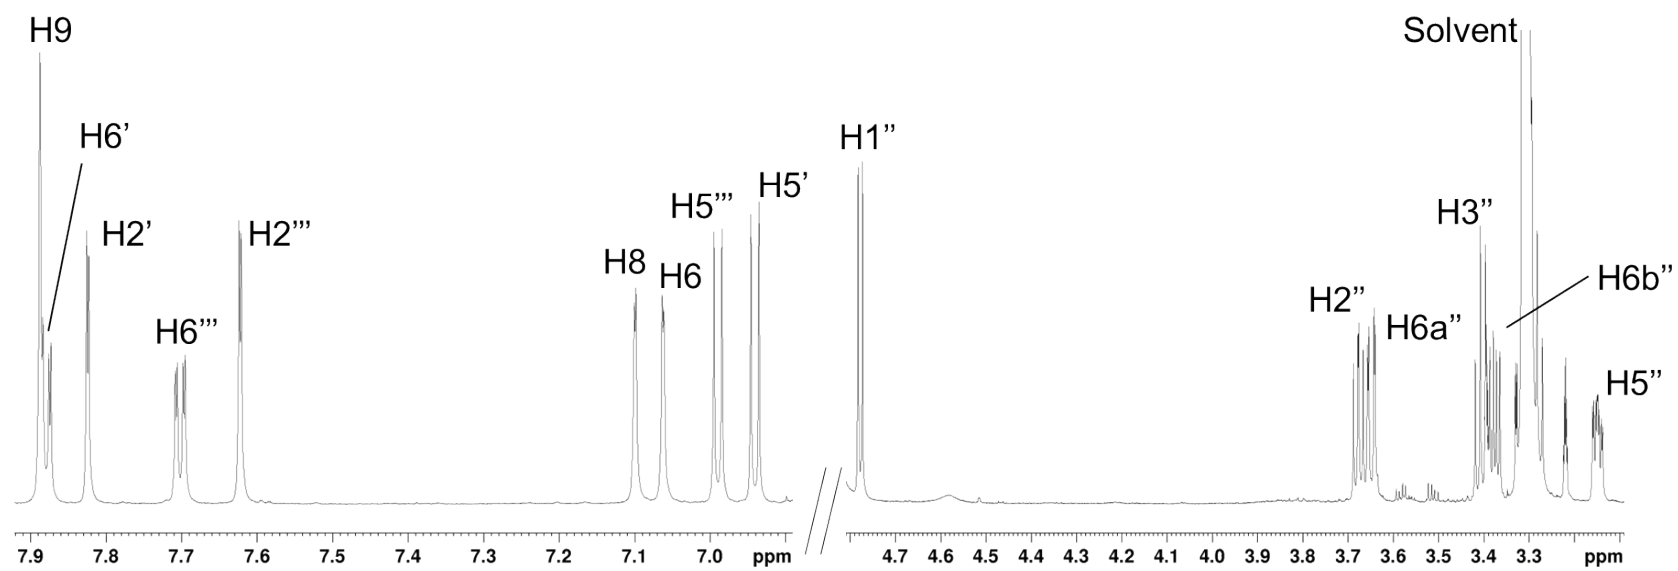

**Figure S2.**  $^1\text{H}$  NMR spectrum for 10-catechyl-pyranocyanidin-3-O- $\beta$ -glucoside.

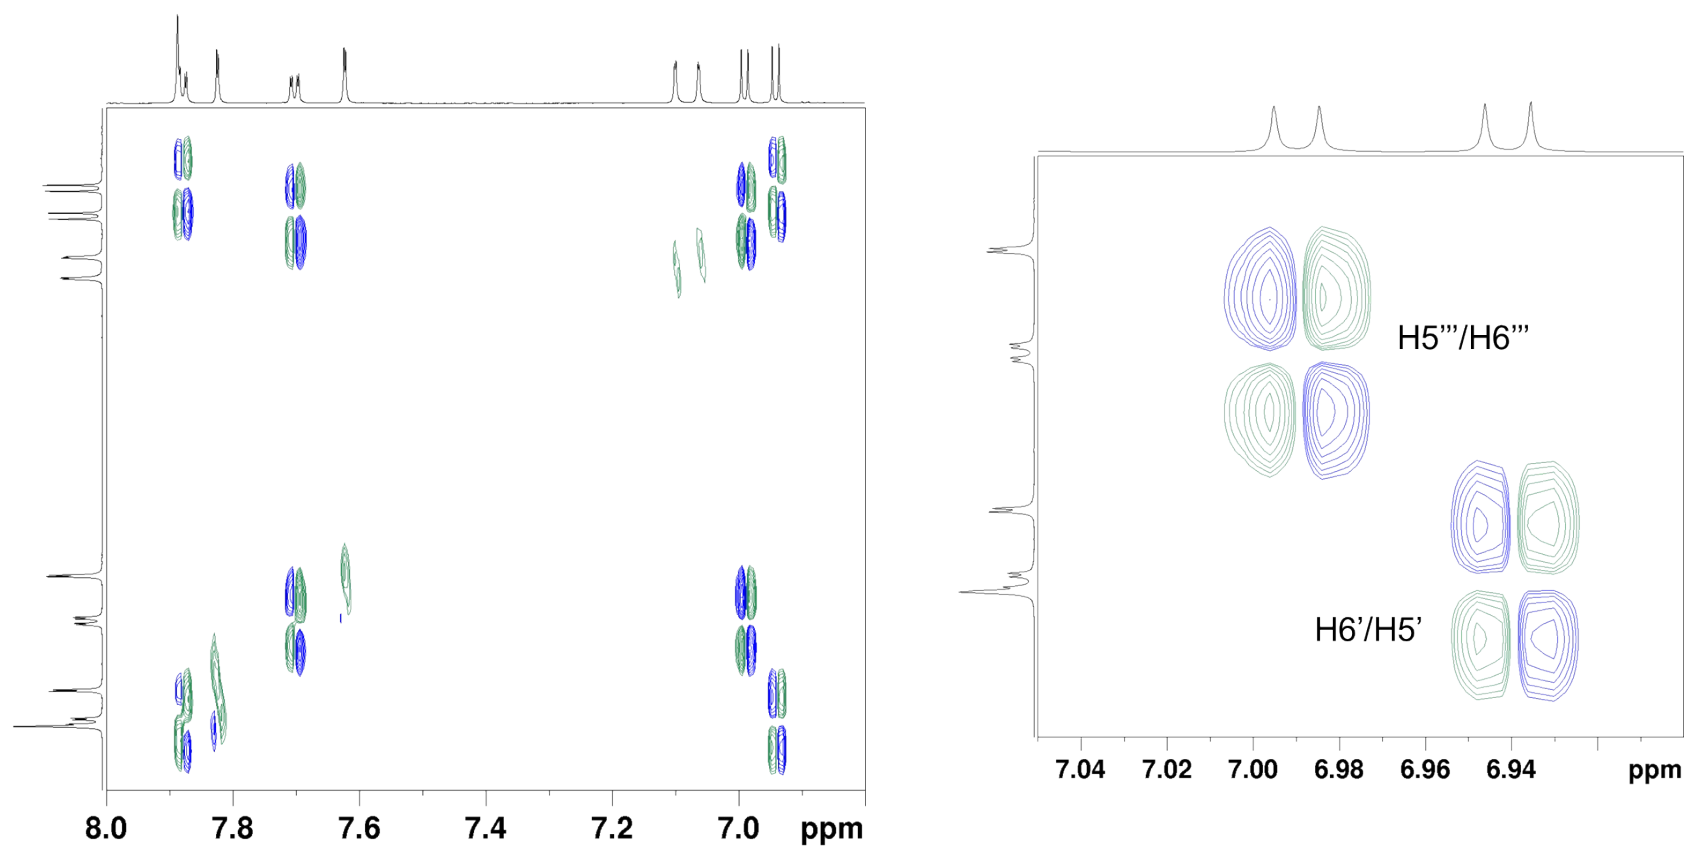

**Figure S3.** COSY spectrum for 10-catechyl-pyranocyanidin-3-O- $\beta$ -glucoside.

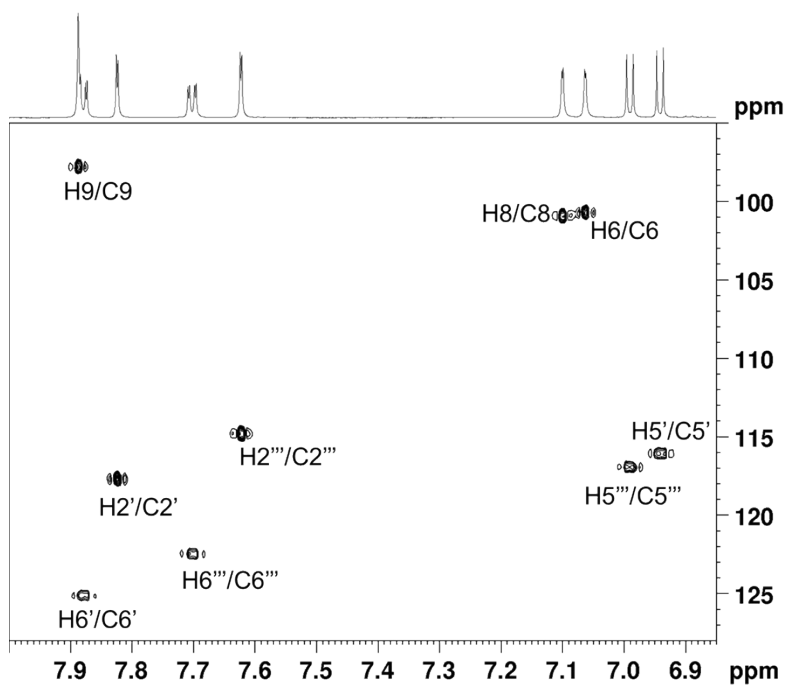

**Figure S4.** HSQC-DEPT spectrum for 10-catechyl-pyranocyanidin-3-O- $\beta$ -glucoside.

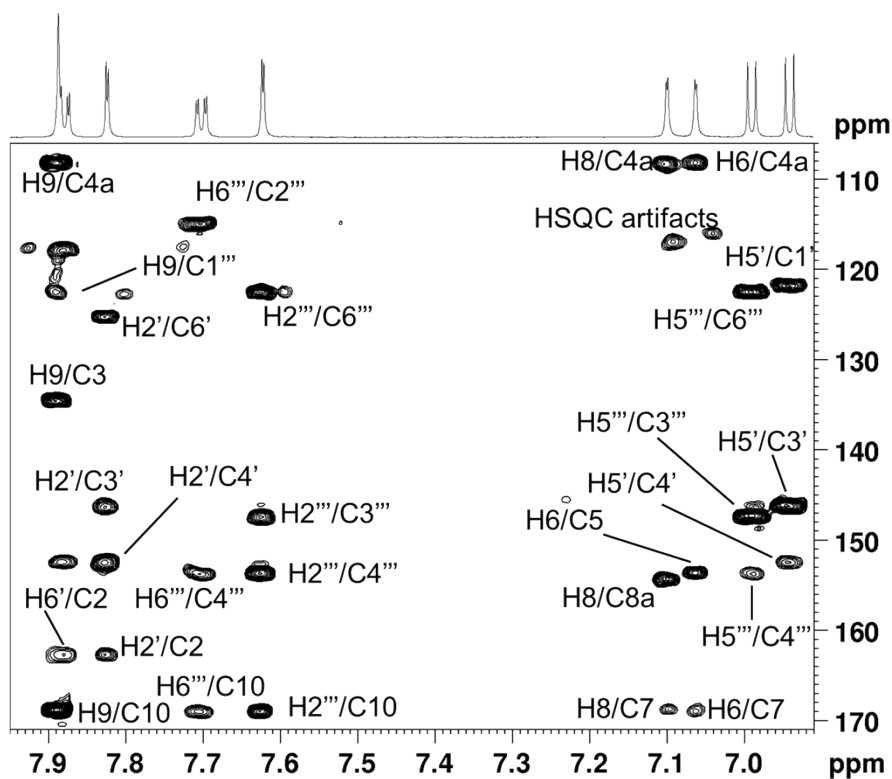

**Figure S5.** HMBC spectrum for 10-catechyl-pyranocyanidin-3-O- $\beta$ -glucoside.

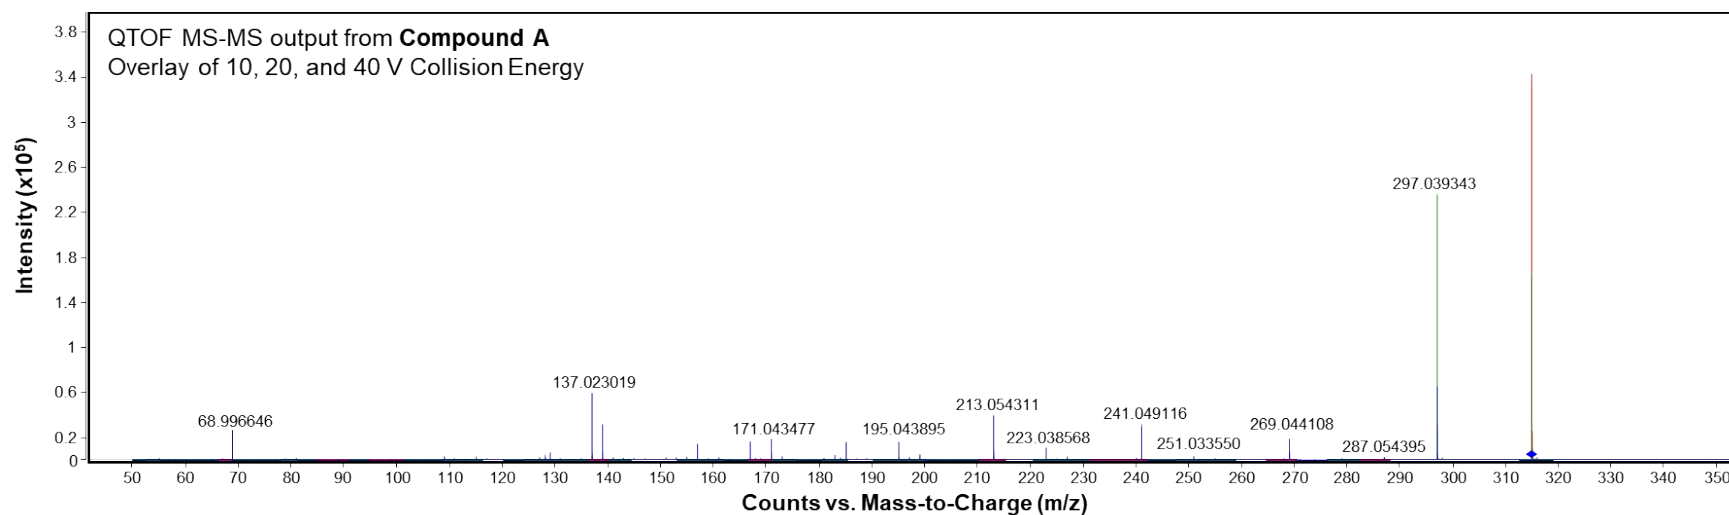

**Figure S6.** High resolution MS/MS fragmentation of 4-carboxy-3-deoxycyanidin (compound **A**) in positive ion mode using collision energies of 10 (red), 20 (green), and 40 eV (blue), where eV is electron volts.

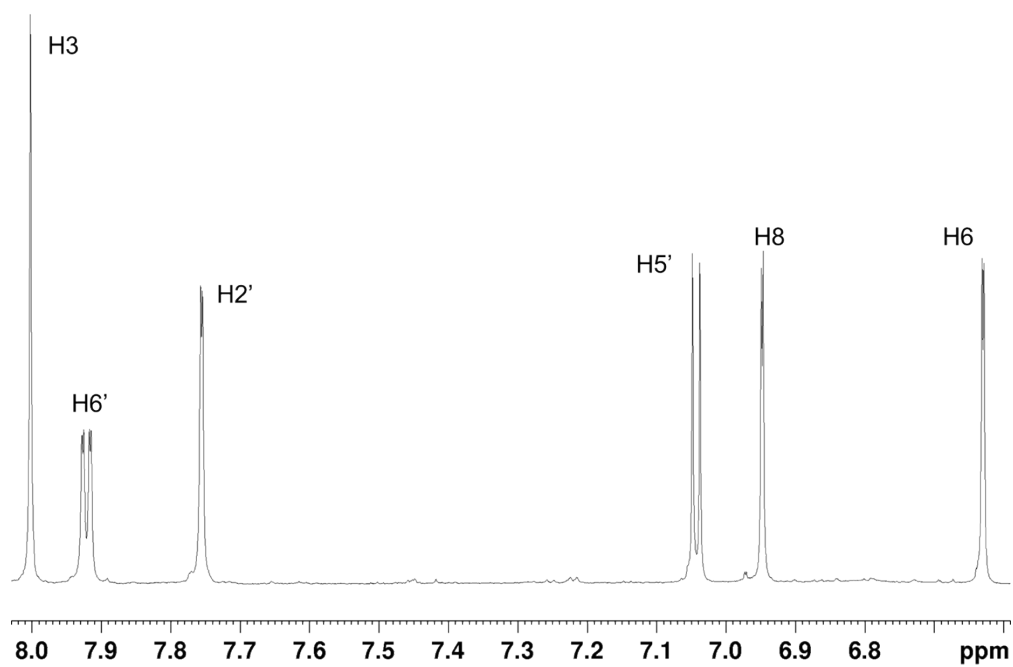

**Figure S7.**  $^1\text{H}$  NMR spectrum for 4-carboxy-3-deoxycyanidin (compound A).

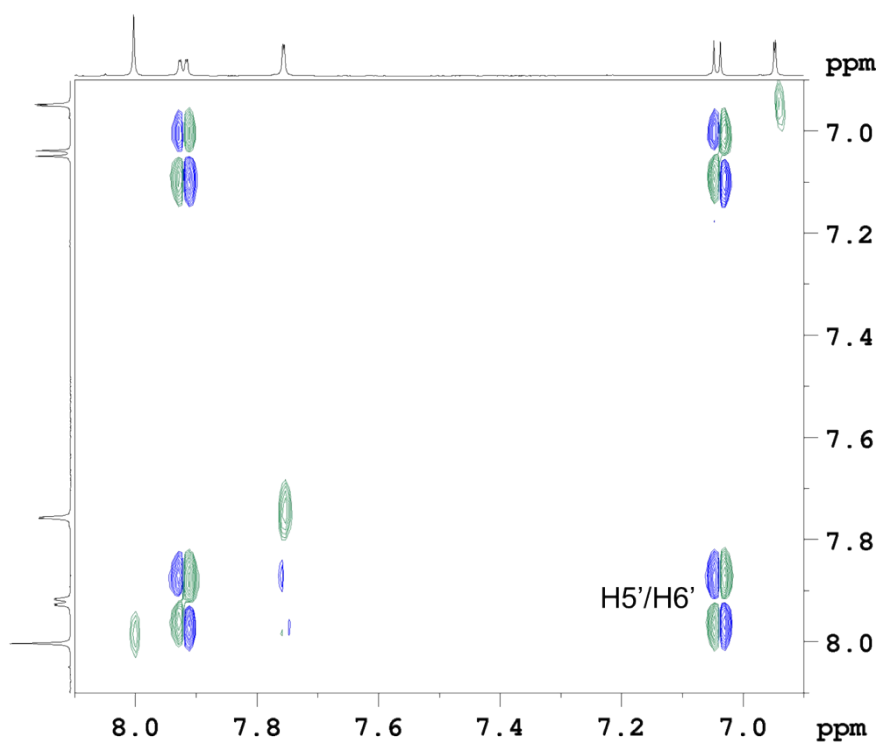

**Figure S8.** COSY spectrum for 4-carboxy-3-deoxycyanidin (compound A).

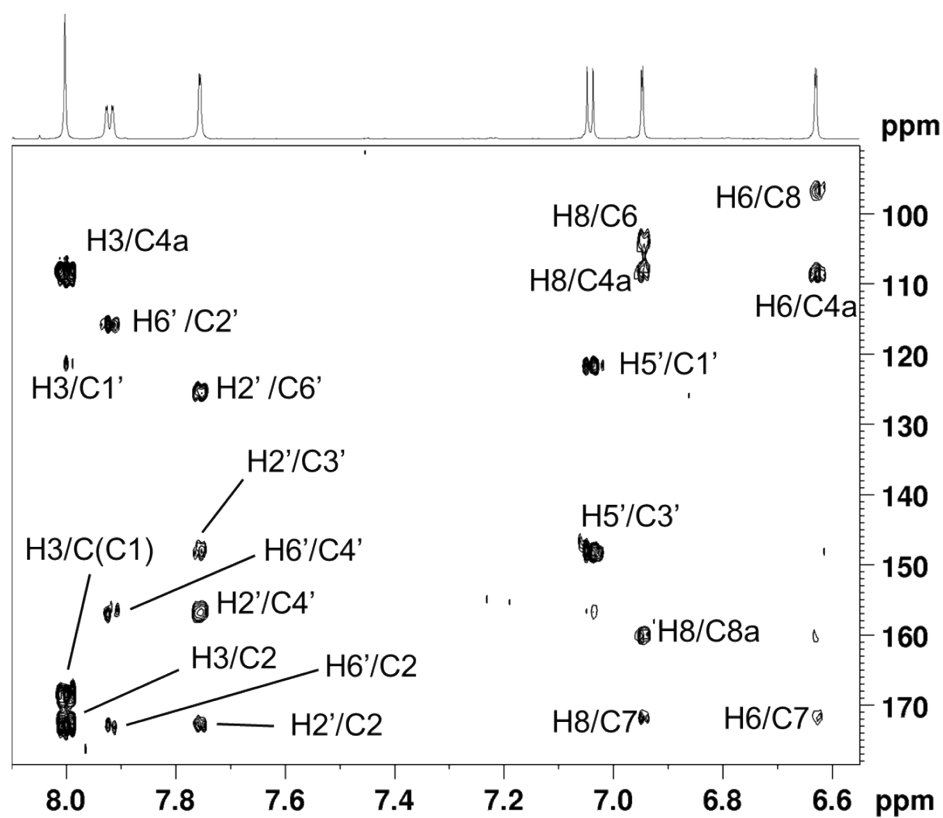

**Figure S9.** HMBC spectrum for 4-carboxy-3-deoxycyanidin (compound A).

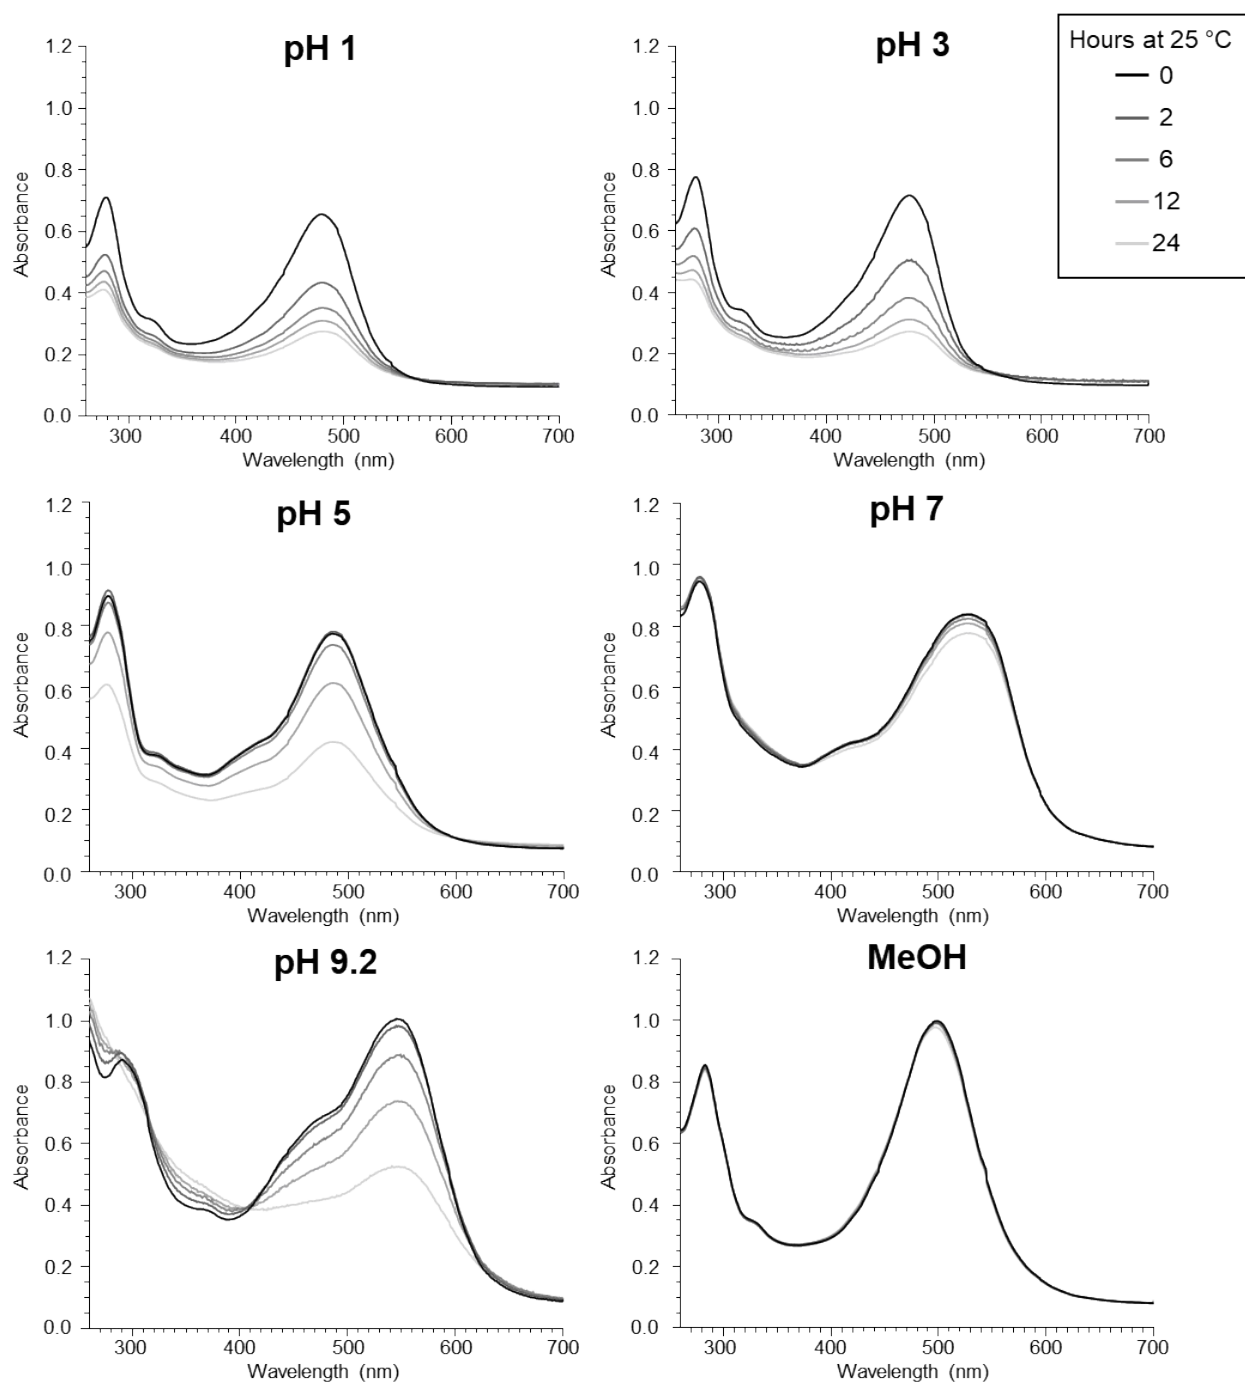

**Figure S10.** Full spectrum absorbance for 4-carboxy-3-deoxycyanidin (compound A) in pH 1–9.2 buffers and MeOH. Spectra show the mean absorption over 24 hours at 25 °C.



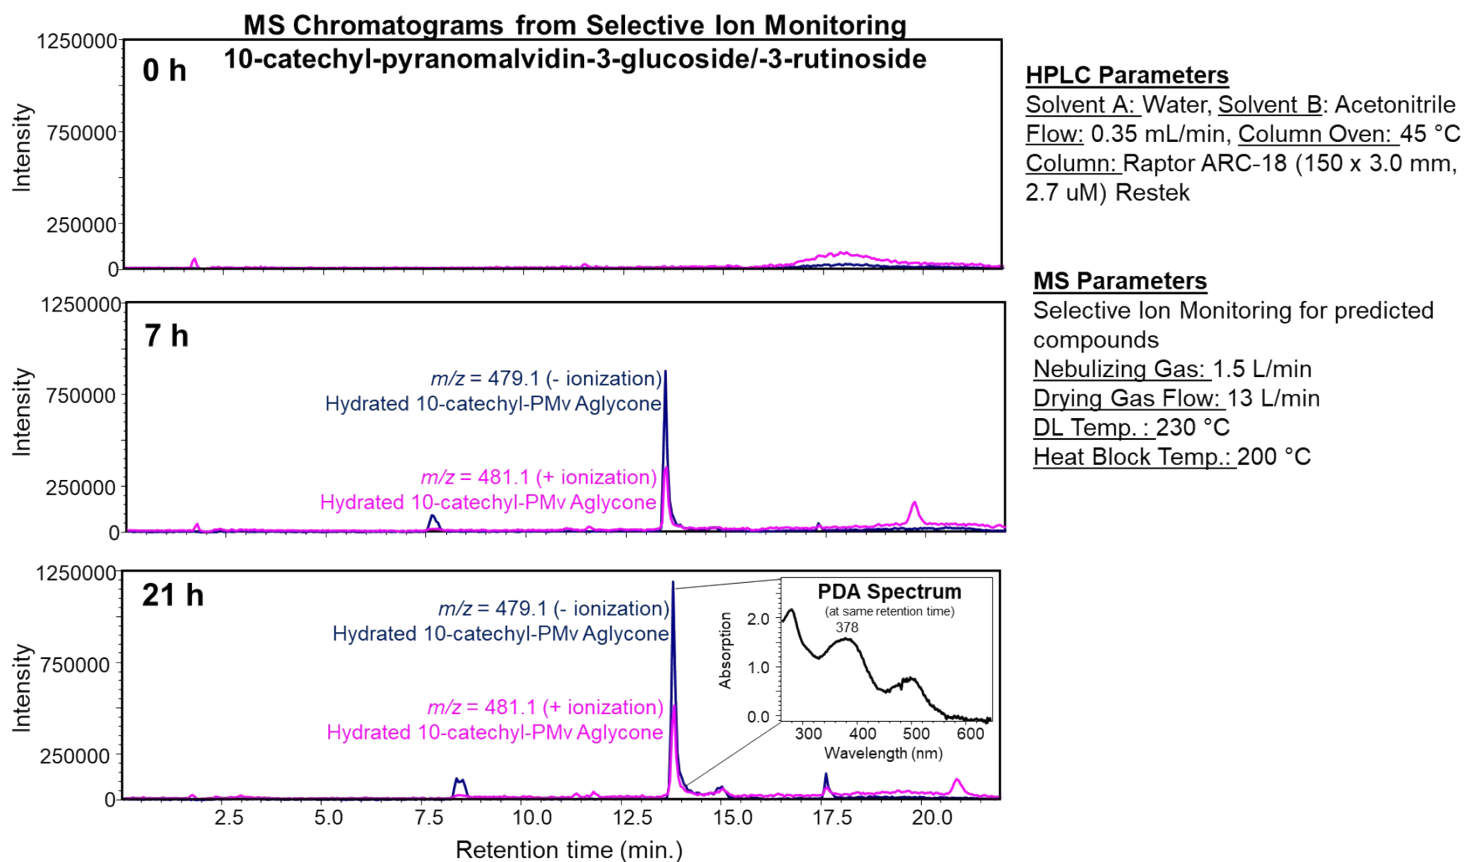

**Figure S11:** MS chromatogram of 10-catechyl-pyranomalvidin-3-glucoside/3-rutinoside in pH 2.8 H<sub>2</sub>O (with HCl) heated at 90 °C for 21 hours. A peak consistent with a hydrated aglycone appeared with heating both in positive and negative ionization mode (481.1 and 479.1, respectively) which corresponded to a peak in PDA with absorption in 370 to 385 nm region. Conditions for HPLC-PDA-MS analysis are shown in the figure using the equipment described in Section 2.2.
